# Supplementary material for: Direct synthesis of platinum nanodots in ZIF-8/Fe3O4 core–shell hybrid nanoparticles
Source: Royal Society of Chemistry journal article supplement (doi:10.1039/c7ra04711h), 2017-01-01
Supplement: c7ra04711h1.pdf [file c7ra04711h1.pdf]

Supporting Information

**Direct Synthesis of Platinum Nanodots in ZIF-8/Fe<sub>3</sub>O<sub>4</sub> Core-Shell Hybrid Nanoparticles**

*Sanghee Lee, Changyong Yim and Sangmin Jeon\**

*Department of Chemical Engineering, Pohang University of Science and Technology (POSTECH), Pohang, Gyeongbuk, Republic of Korea*

\*Author to whom correspondence should be addressed. E-mail: [jeons@postech.ac.kr](mailto:jeons@postech.ac.kr)

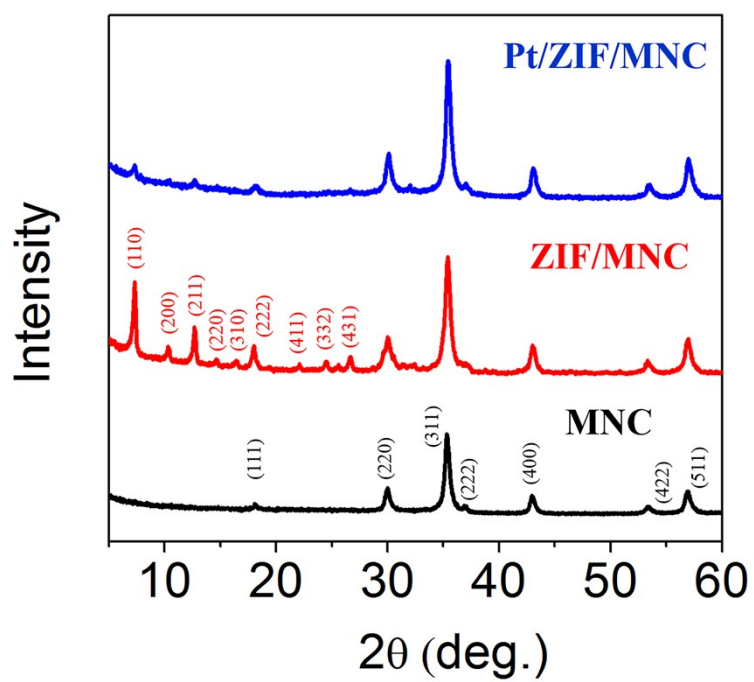

**Figure S1.** X-ray diffraction patterns of MNCs (black), ZIF/MNCs (red), and Pt/ZIF/MNCs (blue), respectively.

**(a) ZIF-8**

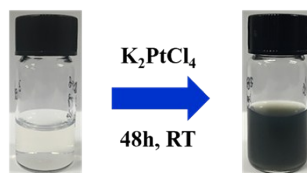

**(b) ZIF-67**

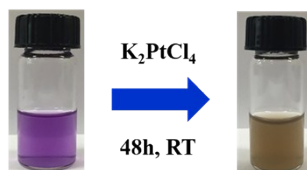

**(c) ZIF-7**

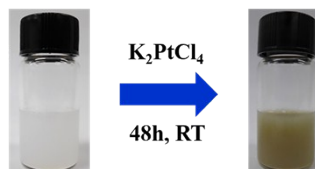

**(d) ZIF-90**

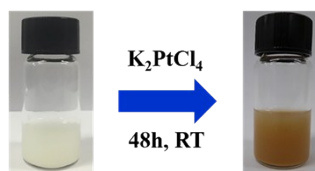

**(e) Imidazolate**

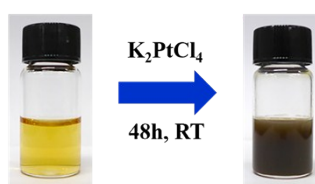

**Figure S2.** Optical images of a glass vial containing 1 mg/mL  $K_2PtCl_4$  solution before and after the reduction of platinum ions using (a) ZIF-8, (b) ZIF-67, (c) ZIF-7 (Zn, Benzimidazole), (d) ZIF-90 (Zn, imidazolate-2-carboxyaldehyde), and (e) imidazolate (sodium imidazolate derivative).

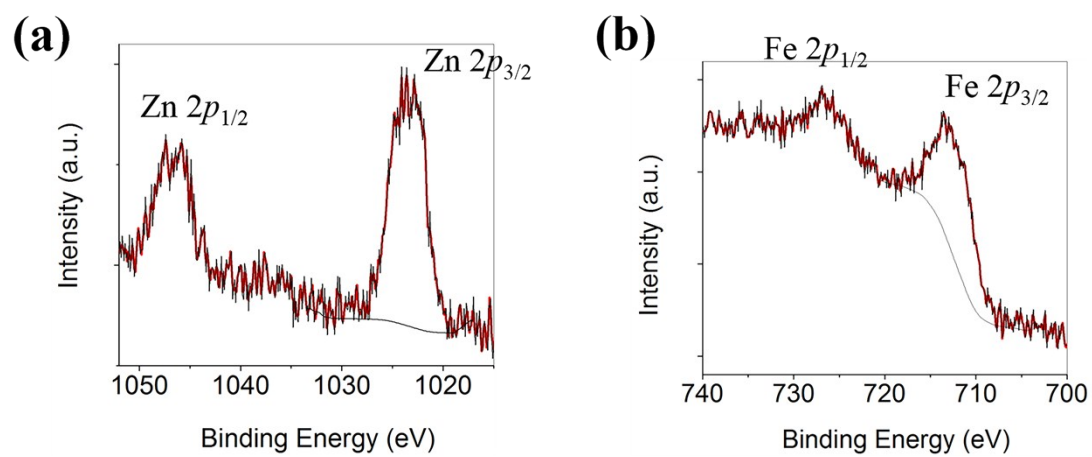

**Figure S3.** XPS spectra of (a) Zn 2p and (b) Fe 2p.
